# Supplementary material for: Neurogenic and Neuroprotective Potential of Stem/Stromal Cells Derived from Adipose Tissue
Source: MDPI journal article supplement (doi:10.3390/cells10061475), 2021-06-11
Supplement: s1 [file s1]

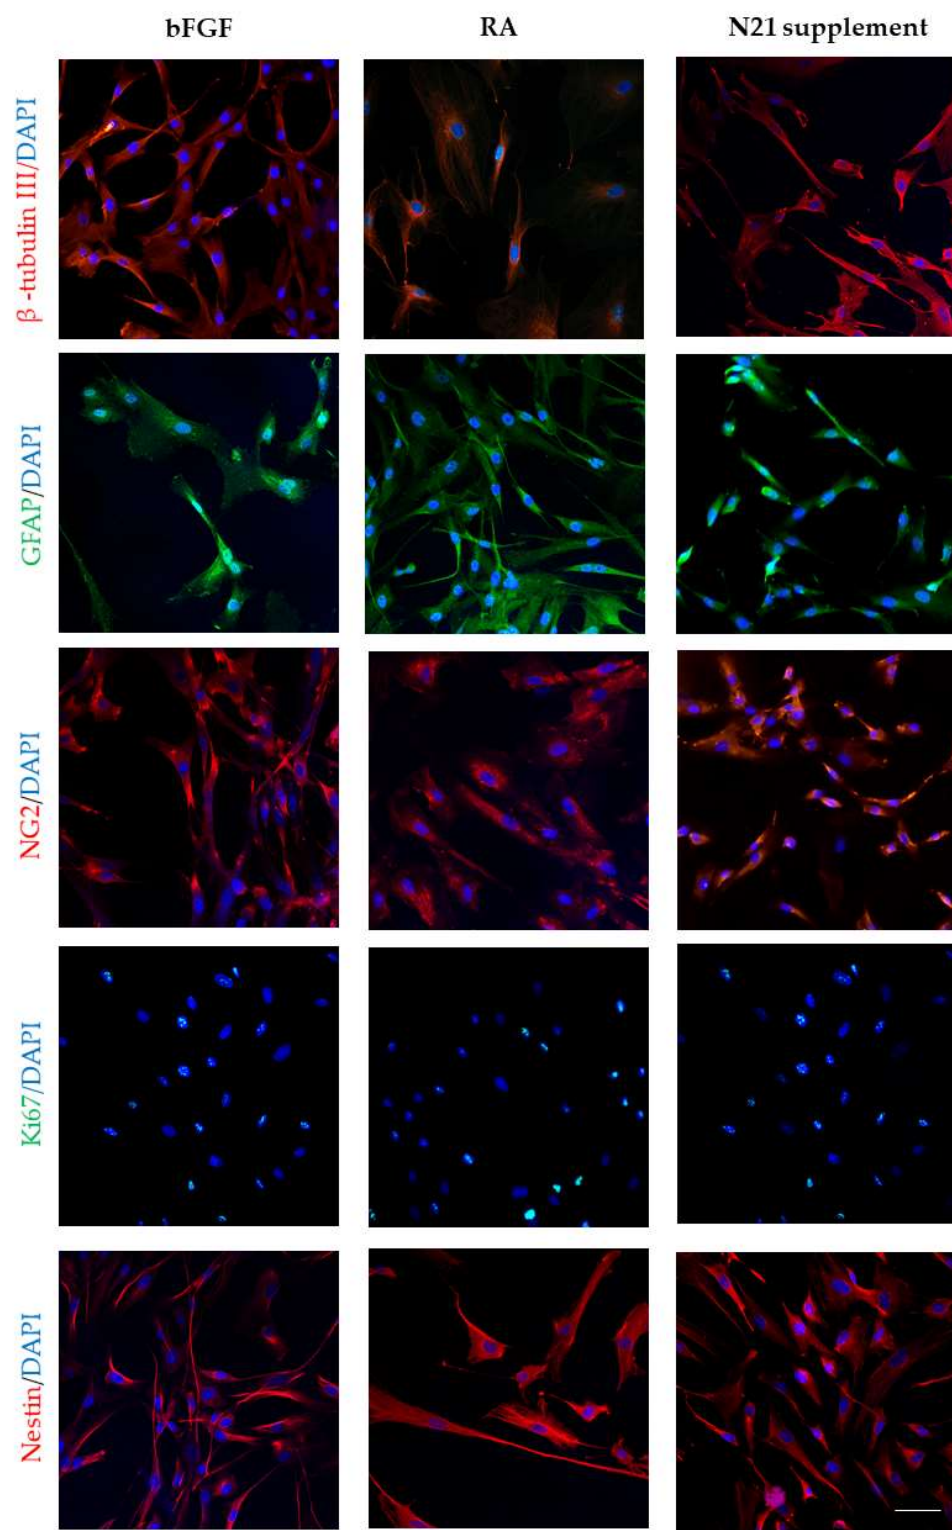

Figure S1. Immunofluorescent images of ASCs after bFGF, RA and N21 treatment. Stainings with neural (Nestin, NG2, GFAP,  $\beta$ -tubulin III), proliferation (Ki67) markers. Scale bar 50  $\mu$ m.
